# Supplementary material for: Rational design of novel fluorescent analogues of cholesterol: a “step-by-step” computational study
Source: Royal Society of Chemistry journal article supplement (doi:10.1039/c9cp01902b), 2019-01-01
Supplement: c9cp01902b1.pdf [file c9cp01902b1.pdf]

## SUPPORTING INFORMATION

# “Rational design of novel fluorescent analogues of cholesterol: a “step-by-step” computational study”

Andrea Bonvicini,<sup>a,\*</sup> Peter Reinholdt,<sup>b,\*</sup> Vincent Tognetti,<sup>a</sup> Laurent Joubert,<sup>a,†</sup> Daniel Wüstner<sup>c</sup> and Jacob Kongsted<sup>b,†</sup>

<sup>a</sup> Normandy Univ. COBRA UMR 6014 & FR 3038, Université de Rouen, INSA Rouen, CNRS, 1 rue Tesnière 76821 Mont Saint Aignan, Cedex, France

<sup>b</sup> Department of Physics, Chemistry and Pharmacy, University of Southern Denmark, DK-5230, Odense M, Denmark

<sup>c</sup> Department of Biochemistry and Molecular Biology, University of Southern Denmark, DK-5230 Odense, Denmark

\* A.B. and P.R. contributed equally to this work

† Corresponding authors

|                                            |          |
|--------------------------------------------|----------|
| <b>1. OPTICAL PROPERTIES.....</b>          | <b>2</b> |
| <b>2. MOLECULAR DYNAMICS IN POPC .....</b> | <b>3</b> |
| <b>3. BIBLIOGRAPHY .....</b>               | <b>8</b> |

# 1. Optical properties

## 1.1. CASPT2 energies for probes **8** and **10**

In order to check the presence that no dark states are below the bright excited state (characterized by a HOMO  $\rightarrow$  LUMO transition), we performed a CASPT2 excited state analysis based on a multireference CASSCF(8, 8)-SA11 wavefunction using the ANO-LVDZP basis-set. These computations were performed with MOLCAS 8.0 quantum chemistry software<sup>1</sup>. As we can see, no dark excited states are present below the bright excited state ( $S_1$ ) for both probe **8** and, more importantly, for probe **10**. As in TD-DFT computations, presented in the main article, the bright state  $S_1$  is described by a single excitation HOMO  $\rightarrow$  LUMO transition. The dominant CI-coefficient, for this HOMO  $\rightarrow$  LUMO configuration, are -0.91155 and 0.74507 for probes **8** and **10**, respectively.

Table 1: CASPT2 energies for the ground state and the first 10 singlet excited state

| Probe     | State          | CASPT2 energy [Hartree] | $\Delta E$ [eV] | $\Delta E$ [nm] | $f(S_0 \rightarrow S_n)$ |
|-----------|----------------|-------------------------|-----------------|-----------------|--------------------------|
| <b>8</b>  | $S_0$          | -1124.84427339          | /               | /               | /                        |
|           | $S_1$          | -1124.72750955          | 3.177           | 390             | 0.394                    |
|           | $S_2$          | -1124.69752380          | 3.993           | 311             | 0.000                    |
|           | $S_3$          | -1124.67543105          | 4.594           | 270             | 0.037                    |
|           | $S_4$          | -1124.66983915          | 4.747           | 261             | 0.002                    |
|           | $S_5$          | -1124.65621984          | 5.117           | 242             | 0.001                    |
|           | $S_6$          | -1124.63694614          | 5.642           | 220             | 0.006                    |
|           | $S_7$          | -1124.63500171          | 5.695           | 218             | 0.014                    |
|           | $S_8$          | -1124.61830540          | 6.149           | 202             | 0.018                    |
|           | $S_9$          | -1124.61011564          | 6.372           | 195             | 0.002                    |
| $S_{10}$  | -1124.52684766 | 8.638                   | 144             | 0.001           |                          |
| <b>10</b> | $S_0$          | -1124.84783247          | /               | /               | /                        |
|           | $S_1$          | -1124.69332332          | 4.204           | 295             | 0.668                    |
|           | $S_2$          | -1124.68748496          | 4.363           | 284             | 0.001                    |
|           | $S_3$          | -1124.67038366          | 4.829           | 257             | 0.010                    |
|           | $S_4$          | -1124.65748752          | 5.180           | 239             | 0.032                    |
|           | $S_5$          | -1124.65584240          | 5.224           | 237             | 0.340                    |
|           | $S_6$          | -1124.62510039          | 6.061           | 205             | 0.012                    |
|           | $S_7$          | -1124.61558977          | 6.320           | 196             | 0.230                    |
|           | $S_8$          | -1124.60706099          | 6.552           | 189             | 0.005                    |
|           | $S_9$          | -1124.58373118          | 7.187           | 173             | 0.001                    |
| $S_{10}$  | -1124.57949729 | 7.302                   | 170             | 0.044           |                          |

## 2. Molecular dynamics in POPC

### 2.1. GAFF force field for cholesterol, probe **8** and **10**

In the following tables (Table 2, Table 3 and Table 4) we list GAFF atoms type and RESP charges used in the molecular dynamics simulation performed in this work together with their ground state geometries (obtained at B3LYP/6-31+G(d) level of theory in vacuum).

Table 2: Ground state geometry, atom names, GAFF atom-types and RESP charges and isotropic polarizability  $\alpha_{iso}$  for cholesterol.

| Cholesterol |      |        |        |        |                |             |                |
|-------------|------|--------|--------|--------|----------------|-------------|----------------|
| Atom number | Name | X [Å]  | Y [Å]  | Z [Å]  | GAFF atom-type | RESP Charge | $\alpha_{iso}$ |
| 1           | C3   | 6.879  | -0.082 | -0.801 | c3             | 0.378828    | 7.52532704     |
| 2           | O1   | 8.294  | -0.065 | -0.568 | oh             | -0.751689   | 5.78273641     |
| 3           | HO1  | 8.718  | -0.682 | -1.185 | ho             | 0.423029    | 1.45927443     |
| 4           | H31  | 6.675  | 0.260  | -1.830 | h1             | -0.019871   | 1.85606657     |
| 5           | C4   | 6.254  | 0.909  | 0.180  | c3             | -0.008496   | 8.28625582     |
| 6           | H41  | 6.591  | 0.624  | 1.188  | hc             | 0.072237    | 1.85981222     |
| 7           | H42  | 6.651  | 1.913  | -0.008 | hc             | 0.072237    | 1.90550381     |
| 8           | C5   | 4.738  | 0.922  | 0.100  | c2             | -0.410084   | 9.38013989     |
| 9           | C6   | 4.079  | 2.079  | -0.056 | c2             | -0.181935   | 9.48966611     |
| 10          | H61  | 4.656  | 3.000  | -0.150 | ha             | 0.118276    | 2.13067117     |
| 11          | C7   | 2.584  | 2.222  | -0.114 | c3             | -0.008375   | 8.01595289     |
| 12          | H71  | 2.274  | 3.084  | 0.494  | hc             | 0.026749    | 2.00261433     |
| 13          | H72  | 2.283  | 2.471  | -1.146 | hc             | 0.026749    | 1.87565226     |
| 14          | C8   | 1.840  | 0.959  | 0.350  | c3             | 0.055053    | 8.30976134     |
| 15          | H81  | 1.896  | 0.925  | 1.448  | hc             | 0.002266    | 1.64573912     |
| 16          | C14  | 0.367  | 0.998  | -0.079 | c3             | 0.018813    | 8.42204347     |
| 17          | H141 | 0.379  | 1.013  | -1.184 | hc             | -0.016960   | 1.71879767     |
| 18          | C15  | -0.500 | 2.186  | 0.360  | c3             | -0.119530   | 7.74240985     |
| 19          | H151 | -0.352 | 2.401  | 1.426  | hc             | 0.018976    | 1.74644610     |
| 20          | H152 | -0.256 | 3.107  | -0.182 | hc             | 0.018976    | 1.94576940     |
| 21          | C16  | -1.949 | 1.704  | 0.078  | c3             | -0.052708   | 7.57859951     |
| 22          | H161 | -2.593 | 1.868  | 0.952  | hc             | 0.017247    | 1.83108783     |
| 23          | H162 | -2.399 | 2.269  | -0.745 | hc             | 0.017247    | 1.89258326     |
| 24          | C17  | -1.872 | 0.176  | -0.268 | c3             | -0.032017   | 8.75505836     |
| 25          | H171 | -1.796 | 0.080  | -1.364 | hc             | -0.037496   | 1.76402732     |
| 26          | C13  | -0.475 | -0.252 | 0.304  | c3             | 0.460490    | 8.56285985     |
| 27          | C18  | -0.563 | -0.454 | 1.834  | c3             | -0.453169   | 6.99109867     |
| 28          | H181 | 0.423  | -0.511 | 2.302  | hc             | 0.087135    | 1.90436703     |
| 29          | H182 | -1.107 | 0.360  | 2.325  | hc             | 0.087135    | 1.72393117     |
| 30          | H183 | -1.089 | -1.385 | 2.073  | hc             | 0.087135    | 1.87649897     |
| 31          | C12  | 0.209  | -1.463 | -0.366 | c3             | -0.056081   | 7.73584487     |
| 32          | H121 | -0.296 | -2.401 | -0.114 | hc             | -0.010733   | 1.94597956     |
| 33          | H122 | 0.134  | -1.352 | -1.459 | hc             | -0.010733   | 1.74600306     |
| 34          | C11  | 1.693  | -1.581 | 0.040  | c3             | -0.112061   | 7.54481247     |
| 35          | H111 | 1.741  | -1.831 | 1.105  | hc             | 0.018586    | 1.60138308     |
| 36          | H112 | 2.132  | -2.434 | -0.492 | hc             | 0.018586    | 1.93903499     |
| 37          | C9   | 2.526  | -0.306 | -0.231 | c3             | -0.036960   | 8.42607955     |
| 38          | H91  | 2.542  | -0.159 | -1.325 | hc             | -0.016648   | 1.68257052     |
| 39          | C10  | 4.027  | -0.436 | 0.207  | c3             | 0.570986    | 8.82640231     |
| 40          | C19  | 4.150  | -0.949 | 1.667  | c3             | -0.209529   | 7.19731538     |
| 41          | H191 | 3.844  | -1.997 | 1.752  | hc             | 0.031785    | 1.84347048     |
| 42          | H192 | 5.179  | -0.882 | 2.032  | hc             | 0.031785    | 1.92703743     |
| 43          | H193 | 3.529  | -0.353 | 2.345  | hc             | 0.031785    | 1.74234186     |
| 44          | C1   | 4.744  | -1.431 | -0.757 | c3             | -0.098195   | 7.73358052     |
| 45          | H11  | 4.342  | -2.441 | -0.613 | hc             | 0.004995    | 1.87933166     |
| 46          | H12  | 4.501  | -1.145 | -1.791 | hc             | 0.004995    | 1.72468700     |
| 47          | C2   | 6.273  | -1.473 | -0.607 | c3             | -0.127133   | 7.82100959     |

|    |      |         |        |        |    |           |            |
|----|------|---------|--------|--------|----|-----------|------------|
| 48 | H21  | 6.693   | -2.175 | -1.342 | hc | 0.030841  | 2.19436286 |
| 49 | H22  | 6.560   | -1.844 | 0.386  | hc | 0.030841  | 1.79025242 |
| 50 | C20  | -3.150  | -0.592 | 0.158  | c3 | 0.187074  | 8.78398973 |
| 51 | H201 | -3.283  | -0.452 | 1.243  | hc | -0.031548 | 1.78696205 |
| 52 | C21  | -3.076  | -2.104 | -0.116 | c3 | -0.298829 | 7.28927144 |
| 53 | H211 | -2.860  | -2.304 | -1.175 | hc | 0.059599  | 1.74095443 |
| 54 | H212 | -4.022  | -2.598 | 0.129  | hc | 0.059599  | 2.11061672 |
| 55 | H213 | -2.301  | -2.594 | 0.479  | hc | 0.059599  | 1.86141947 |
| 56 | C22  | -4.392  | 0.022  | -0.536 | c3 | -0.039615 | 8.56967625 |
| 57 | H221 | -4.379  | 1.110  | -0.401 | hc | 0.003047  | 1.69440175 |
| 58 | H222 | -4.312  | -0.150 | -1.622 | hc | 0.003047  | 1.82432582 |
| 59 | C23  | -5.755  | -0.492 | -0.043 | c3 | 0.048794  | 8.37314366 |
| 60 | H231 | -5.875  | -1.558 | -0.279 | hc | -0.002549 | 1.74572690 |
| 61 | H232 | -5.790  | -0.411 | 1.053  | hc | -0.002549 | 1.74419898 |
| 62 | C24  | -6.928  | 0.282  | -0.665 | c3 | -0.183603 | 8.45937794 |
| 63 | H241 | -6.863  | 1.342  | -0.372 | hc | 0.027806  | 1.80320613 |
| 64 | H242 | -6.816  | 0.264  | -1.759 | hc | 0.027806  | 1.84661334 |
| 65 | C25  | -8.334  | -0.246 | -0.312 | c3 | 0.440534  | 8.42696324 |
| 66 | H251 | -8.368  | -1.312 | -0.587 | hc | -0.075146 | 1.94260581 |
| 67 | C26  | -8.644  | -0.136 | 1.190  | c3 | -0.313515 | 7.48903306 |
| 68 | H261 | -9.655  | -0.502 | 1.409  | hc | 0.058435  | 2.12100669 |
| 69 | H262 | -7.944  | -0.719 | 1.799  | hc | 0.058435  | 1.86713877 |
| 70 | H263 | -8.588  | 0.909  | 1.523  | hc | 0.058435  | 1.77742806 |
| 71 | C27  | -9.405  | 0.483  | -1.138 | c3 | -0.313515 | 7.77477783 |
| 72 | H271 | -9.219  | 0.380  | -2.215 | hc | 0.058435  | 1.88779141 |
| 73 | H272 | -10.407 | 0.086  | -0.932 | hc | 0.058435  | 2.12417547 |
| 74 | H273 | -9.420  | 1.557  | -0.904 | hc | 0.058435  | 1.82240413 |

Table 3: Ground state geometry, atom names, GAFF atom-types and RESP charges and isotropic polarizability  $\alpha_{iso}$  for probe

8.

| 8           |      |        |        |        |                |             |                |
|-------------|------|--------|--------|--------|----------------|-------------|----------------|
| Atom number | Name | X [Å]  | Y [Å]  | Z [Å]  | GAFF atom-type | RESP Charge | $\alpha_{iso}$ |
| 1           | C3   | -6.821 | -0.372 | 0.302  | c3             | 0.379537    | 7.83287132     |
| 2           | O1   | -8.207 | -0.458 | -0.049 | oh             | -0.751834   | 5.97916166     |
| 3           | HO1  | -8.640 | -1.094 | 0.543  | ho             | 0.426420    | 1.48724839     |
| 4           | H31  | -6.727 | -0.015 | 1.341  | h1             | -0.017557   | 1.85515560     |
| 5           | C4   | -6.191 | 0.653  | -0.640 | c3             | -0.042345   | 8.80726285     |
| 6           | H41  | -6.424 | 0.321  | -1.665 | hc             | 0.086903    | 2.06119467     |
| 7           | H42  | -6.677 | 1.627  | -0.513 | hc             | 0.086903    | 1.98966366     |
| 8           | C5   | -4.696 | 0.787  | -0.459 | c2             | -0.372427   | 10.74453013    |
| 9           | C6   | -4.082 | 1.986  | -0.584 | ce             | -0.104696   | 10.85790610    |
| 10          | H61  | -4.682 | 2.877  | -0.765 | ha             | 0.120410    | 2.18964225     |
| 11          | C7   | -2.640 | 2.132  | -0.552 | ce             | -0.160831   | 11.28198516    |
| 12          | H71  | -2.205 | 3.079  | -0.865 | ha             | 0.122079    | 1.79207853     |
| 13          | C8   | -1.838 | 1.128  | -0.113 | cf             | -0.053637   | 13.38385678    |
| 14          | C14  | -0.409 | 1.279  | 0.108  | cf             | -0.240229   | 13.66594762    |
| 15          | C15  | 0.293  | 2.375  | 0.511  | ce             | -0.098201   | 10.39188990    |
| 16          | H152 | -0.113 | 3.371  | 0.660  | ha             | 0.121469    | 1.84788643     |
| 17          | C16  | 1.664  | 1.990  | 0.825  | ce             | -0.200848   | 9.45199949     |
| 18          | H162 | 2.424  | 2.690  | 1.163  | ha             | 0.138680    | 2.19139163     |
| 19          | C17  | 1.830  | 0.653  | 0.658  | c2             | -0.290057   | 11.96376277    |
| 20          | C13  | 0.521  | 0.075  | 0.123  | c3             | 0.611216    | 11.27203078    |
| 21          | C18  | 0.761  | -0.454 | -1.316 | c3             | -0.340933   | 6.88150629     |
| 22          | H181 | -0.172 | -0.761 | -1.797 | hc             | 0.066290    | 1.68130482     |
| 23          | H182 | 1.214  | 0.327  | -1.936 | hc             | 0.066290    | 1.67345670     |
| 24          | H183 | 1.436  | -1.319 | -1.303 | hc             | 0.066290    | 1.87687509     |
| 25          | C12  | -0.140 | -0.998 | 1.023  | c3             | -0.020602   | 8.76388288     |
| 26          | H121 | 0.479  | -1.906 | 1.053  | hc             | -0.005185   | 1.98576558     |
| 27          | H122 | -0.192 | -0.611 | 2.050  | hc             | -0.005185   | 1.66070977     |
| 28          | C11  | -1.551 | -1.359 | 0.526  | c3             | -0.086898   | 8.96664695     |
| 29          | H111 | -1.464 | -1.862 | -0.443 | hc             | -0.000889   | 1.54280150     |
| 30          | H112 | -1.985 | -2.095 | 1.213  | hc             | -0.000889   | 1.87630289     |
| 31          | C9   | -2.510 | -0.148 | 0.408  | c3             | 0.161217    | 11.08238011    |
| 32          | H91  | -2.807 | 0.116  | 1.442  | hc             | -0.008512   | 1.70117090     |
| 33          | C10  | -3.852 | -0.488 | -0.329 | c3             | 0.392685    | 11.05577120    |
| 34          | C19  | -3.606 | -1.018 | -1.769 | c3             | -0.131381   | 6.90892338     |
| 35          | H191 | -3.124 | -2.002 | -1.762 | hc             | 0.025392    | 1.70777342     |
| 36          | H192 | -4.548 | -1.124 | -2.316 | hc             | 0.025392    | 1.90294260     |
| 37          | H193 | -2.971 | -0.327 | -2.334 | hc             | 0.025392    | 1.61651702     |
| 38          | C1   | -4.607 | -1.563 | 0.506  | c3             | -0.048603   | 8.20283188     |
| 39          | H11  | -4.111 | -2.534 | 0.384  | hc             | -0.002412   | 1.77831532     |
| 40          | H12  | -4.524 | -1.302 | 1.571  | hc             | -0.002412   | 1.71409144     |
| 41          | C2   | -6.097 | -1.711 | 0.165  | c3             | -0.142672   | 8.31944624     |
| 42          | H21  | -6.549 | -2.458 | 0.834  | hc             | 0.036590    | 2.21969606     |
| 43          | H22  | -6.238 | -2.080 | -0.860 | hc             | 0.036590    | 1.79780880     |
| 44          | C20  | 3.078  | -0.168 | 0.894  | c3             | 0.292584    | 10.03691504    |
| 45          | H201 | 2.945  | -1.136 | 0.389  | hc             | -0.022635   | 1.69452968     |
| 46          | C21  | 3.262  | -0.466 | 2.401  | c3             | -0.333432   | 7.97522051     |
| 47          | H211 | 3.470  | 0.458  | 2.955  | hc             | 0.074820    | 1.78140752     |
| 48          | H212 | 4.091  | -1.162 | 2.573  | hc             | 0.074820    | 2.31056817     |
| 49          | H213 | 2.358  | -0.913 | 2.829  | hc             | 0.074820    | 1.86735417     |
| 50          | C22  | 4.333  | 0.496  | 0.277  | c3             | -0.101012   | 9.01100958     |
| 51          | H221 | 4.108  | 0.749  | -0.769 | hc             | 0.034646    | 1.77569958     |
| 52          | H222 | 4.525  | 1.451  | 0.787  | hc             | 0.034646    | 1.74074811     |
| 53          | C23  | 5.607  | -0.362 | 0.314  | c3             | 0.042340    | 8.70607620     |
| 54          | H231 | 5.914  | -0.537 | 1.355  | hc             | -0.005945   | 1.81779238     |
| 55          | H232 | 5.384  | -1.349 | -0.115 | hc             | -0.005945   | 1.72475514     |
| 56          | C24  | 6.773  | 0.291  | -0.445 | c3             | -0.148286   | 8.62563957     |
| 57          | H241 | 6.494  | 0.412  | -1.504 | hc             | 0.017384    | 1.79406452     |
| 58          | H242 | 6.918  | 1.309  | -0.052 | hc             | 0.017384    | 1.84783087     |
| 59          | C25  | 8.119  | -0.457 | -0.369 | c3             | 0.444907    | 8.54011875     |
| 60          | H251 | 8.368  | -0.590 | 0.696  | hc             | -0.079539   | 1.96685106     |
| 61          | C26  | 8.057  | -1.850 | -1.016 | c3             | -0.307153   | 7.50560426     |
| 62          | H261 | 9.032  | -2.349 | -0.965 | hc             | 0.056040    | 2.14834221     |

|    |      |        |        |        |    |           |            |
|----|------|--------|--------|--------|----|-----------|------------|
| 63 | H262 | 7.327  | -2.503 | -0.523 | hc | 0.056040  | 1.87954772 |
| 64 | H263 | 7.777  | -1.774 | -2.076 | hc | 0.056040  | 1.77273807 |
| 65 | C27  | 9.237  | 0.382  | -1.008 | c3 | -0.307153 | 7.84044954 |
| 66 | H271 | 9.328  | 1.364  | -0.525 | hc | 0.056040  | 1.89460056 |
| 67 | H272 | 10.209 | -0.121 | -0.930 | hc | 0.056040  | 2.15627136 |
| 68 | H273 | 9.036  | 0.554  | -2.075 | hc | 0.056040  | 1.81391535 |

Table 4: Ground state geometry, atom names, GAFF atom-types and RESP charges and isotropic polarizability  $\alpha_{iso}$  for probe

10.

**10**

| Atom number | Name | X [Å]  | Y [Å]  | Z [Å]  | GAFF atom-type | RESP Charge | $\alpha_{iso}$ |
|-------------|------|--------|--------|--------|----------------|-------------|----------------|
| 1           | C3   | 6.934  | -0.131 | -0.665 | c3             | 0.462102    | 8.57667181     |
| 2           | O1   | 8.221  | 0.196  | -0.108 | oh             | -0.703286   | 6.36886752     |
| 3           | HO1  | 8.845  | -0.509 | -0.347 | ho             | 0.391200    | 1.71731622     |
| 4           | H31  | 7.061  | -0.283 | -1.753 | h1             | -0.050194   | 2.19094507     |
| 5           | C4   | 6.043  | 1.059  | -0.463 | c2             | -0.254458   | 11.67352752    |
| 6           | H42  | 6.502  | 2.026  | -0.667 | ha             | 0.146240    | 2.16403734     |
| 7           | C5   | 4.737  | 0.998  | -0.122 | ce             | -0.106399   | 12.17971468    |
| 8           | C6   | 3.933  | 2.212  | -0.036 | ce             | -0.181129   | 12.33636836    |
| 9           | H61  | 4.460  | 3.164  | -0.056 | ha             | 0.138004    | 2.14704981     |
| 10          | C7   | 2.581  | 2.193  | 0.067  | cf             | -0.214416   | 12.39709056    |
| 11          | H71  | 2.046  | 3.134  | 0.172  | ha             | 0.136980    | 1.82637149     |
| 12          | C8   | 1.818  | 0.958  | 0.014  | cf             | 0.023657    | 14.23670776    |
| 13          | C14  | 0.475  | 0.912  | 0.228  | ce             | -0.026294   | 14.38557838    |
| 14          | C15  | -0.452 | 2.022  | 0.416  | ce             | -0.150062   | 11.07901447    |
| 15          | H152 | -0.167 | 3.031  | 0.697  | ha             | 0.133945    | 1.82405626     |
| 16          | C16  | -1.708 | 1.633  | 0.123  | c2             | -0.317713   | 10.90757318    |
| 17          | H162 | -2.567 | 2.295  | 0.142  | ha             | 0.160393    | 2.33860489     |
| 18          | C17  | -1.769 | 0.182  | -0.334 | c3             | 0.070291    | 10.40472434    |
| 19          | H171 | -1.726 | 0.186  | -1.439 | hc             | 0.021437    | 1.79648409     |
| 20          | C13  | -0.372 | -0.366 | 0.176  | c3             | 0.266833    | 10.57410738    |
| 21          | C18  | -0.501 | -0.910 | 1.624  | c3             | -0.331857   | 7.15351214     |
| 22          | H181 | 0.484  | -1.102 | 2.059  | hc             | 0.076482    | 1.66934731     |
| 23          | H182 | -1.003 | -0.182 | 2.270  | hc             | 0.076482    | 1.71084648     |
| 24          | H183 | -1.070 | -1.845 | 1.657  | hc             | 0.076482    | 2.02612741     |
| 25          | C12  | 0.322  | -1.390 | -0.742 | c3             | -0.151221   | 9.24886275     |
| 26          | H121 | -0.184 | -2.361 | -0.705 | hc             | 0.032766    | 1.94793234     |
| 27          | H122 | 0.258  | -1.039 | -1.783 | hc             | 0.032766    | 1.68721894     |
| 28          | C11  | 1.802  | -1.577 | -0.362 | c3             | 0.003416    | 9.18656977     |
| 29          | H111 | 1.864  | -2.000 | 0.647  | hc             | 0.018739    | 1.54105062     |
| 30          | H112 | 2.249  | -2.322 | -1.031 | hc             | 0.018739    | 1.85092184     |
| 31          | C9   | 2.605  | -0.266 | -0.450 | c3             | -0.101945   | 11.28437242    |
| 32          | H91  | 2.800  | -0.086 | -1.523 | hc             | 0.042366    | 1.79639515     |
| 33          | C10  | 4.025  | -0.320 | 0.211  | c3             | 0.416652    | 11.42862728    |
| 34          | C19  | 3.911  | -0.442 | 1.753  | c3             | -0.149815   | 6.84847595     |
| 35          | H191 | 3.445  | -1.392 | 2.042  | hc             | 0.030785    | 1.69613391     |
| 36          | H192 | 4.898  | -0.397 | 2.224  | hc             | 0.030785    | 1.84016311     |
| 37          | H193 | 3.310  | 0.371  | 2.172  | hc             | 0.030785    | 1.62739712     |
| 38          | C1   | 4.838  | -1.507 | -0.358 | c3             | -0.110359   | 8.88077671     |
| 39          | H11  | 4.448  | -2.452 | 0.040  | hc             | 0.000629    | 1.74631583     |
| 40          | H12  | 4.700  | -1.546 | -1.449 | hc             | 0.000629    | 1.72906295     |
| 41          | C2   | 6.339  | -1.400 | -0.049 | c3             | -0.033784   | 8.94577250     |
| 42          | H21  | 6.867  | -2.286 | -0.428 | hc             | 0.006495    | 2.27185228     |
| 43          | H22  | 6.509  | -1.366 | 1.034  | hc             | 0.006495    | 1.70632121     |
| 44          | C20  | -3.068 | -0.582 | 0.044  | c3             | 0.155761    | 9.35465557     |
| 45          | H201 | -3.152 | -0.602 | 1.140  | hc             | 0.002741    | 1.81626404     |
| 46          | C21  | -3.048 | -2.035 | -0.467 | c3             | -0.318300   | 7.39193533     |
| 47          | H211 | -2.959 | -2.060 | -1.562 | hc             | 0.068930    | 1.74719391     |
| 48          | H212 | -3.967 | -2.565 | -0.197 | hc             | 0.068930    | 2.19576233     |
| 49          | H213 | -2.215 | -2.609 | -0.054 | hc             | 0.068930    | 1.82397620     |
| 50          | C22  | -4.316 | 0.157  | -0.501 | c3             | -0.042846   | 9.00419394     |
| 51          | H221 | -4.288 | 1.205  | -0.181 | hc             | 0.005802    | 1.73910424     |
| 52          | H222 | -4.269 | 0.174  | -1.601 | hc             | 0.005802    | 1.84508832     |
| 53          | C23  | -5.671 | -0.422 | -0.059 | c3             | 0.071084    | 8.74013463     |
| 54          | H231 | -5.813 | -1.428 | -0.475 | hc             | -0.007237   | 1.77704838     |
| 55          | H232 | -5.669 | -0.536 | 1.034  | hc             | -0.007237   | 1.76963068     |
| 56          | C24  | -6.852 | 0.460  | -0.494 | c3             | -0.188363   | 8.72734175     |
| 57          | H241 | -6.765 | 1.449  | -0.016 | hc             | 0.026465    | 1.82722806     |
| 58          | H242 | -6.773 | 0.640  | -1.577 | hc             | 0.026465    | 1.86614238     |
| 59          | C25  | -8.252 | -0.115 | -0.197 | c3             | 0.452439    | 8.60395444     |
| 60          | H251 | -8.307 | -1.112 | -0.663 | hc             | -0.082185   | 1.95936142     |
| 61          | C26  | -8.514 | -0.281 | 1.308  | c3             | -0.301590   | 7.57294713     |
| 62          | H261 | -9.522 | -0.675 | 1.489  | hc             | 0.054393    | 2.17001359     |
| 63          | H262 | -7.803 | -0.969 | 1.779  | hc             | 0.054393    | 1.88913793     |
| 64          | H263 | -8.439 | 0.685  | 1.826  | hc             | 0.054393    | 1.78802137     |
| 65          | C27  | -9.340 | 0.761  | -0.839 | c3             | -0.301590   | 7.88091443     |
| 66          | H271 | -9.192 | 0.855  | -1.922 | hc             | 0.054393    | 1.89129709     |

|    |      |         |       |        |    |          |            |
|----|------|---------|-------|--------|----|----------|------------|
| 67 | H272 | -10.340 | 0.341 | -0.672 | hc | 0.054393 | 2.16941131 |
| 68 | H273 | -9.331  | 1.774 | -0.413 | hc | 0.054393 | 1.82702304 |

## 2.2. Atom numbering for POPC

In Figure 1 we presents the atom numbering convention used for the analysis of the order parameter for the lipid 1-palmitoyl-2-oleoyl-phosphatidylcholine (POPC).

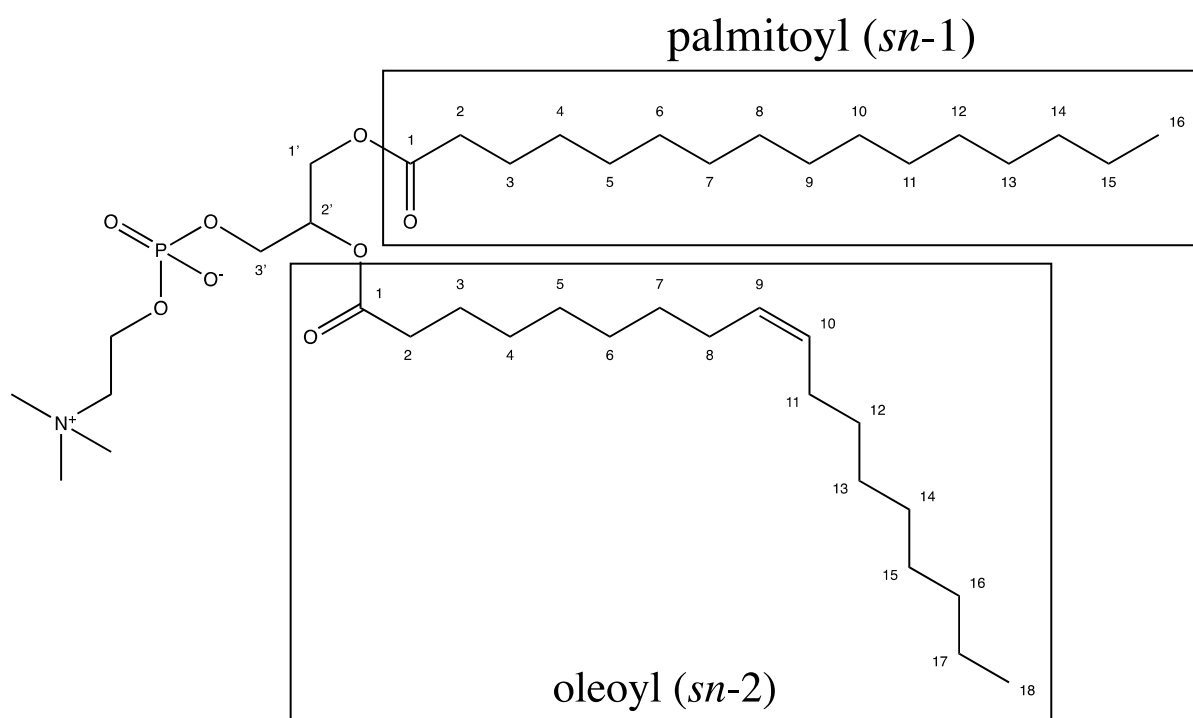

Figure 1: Chemical structure of 1-palmitoyl-2-oleoyl-phosphatidylcholine (POPC) with the atom numbering of the *sn*-1, *sn*-2 used in this study. Atoms labelled with 1', 2' and 3' are those used to extract the rotational autocorrelation function.

## 2.3. POPC rotational correlation time

The estimation of POPC rotational correlation time was based on a previous study (see Supporting Information of ref. 2). The autocorrelation function  $C_f(t)$  is defined by<sup>3</sup>:

$$C_f(t) = \langle f(\xi)f(\xi + t) \rangle_{\xi}$$



where the average is over the time origin  $\xi$ . The integral over the time define the correlation time  $\tau_f$  :

$$\tau_f = \int_0^{\infty} C_f(t) dt$$

We performed the fitting of the rotational correlation function  $C_f(t)$  using a double exponential function defined by:

$$y(t) = a_1 e^{-t/\tau_1} + a_2 e^{-t/\tau_2}$$

The mean correlation time is the integral of the fitting function  $y$  from time origin 0 to infinity (last frame), this equals to the sum of correlation time  $\tau_1$  and  $\tau_2$  each one multiplied by their prefactors  $a_1$  and  $a_2$ :

$$\tau_f = \int_0^{\infty} a_1 e^{-t/\tau_1} + a_2 e^{-t/\tau_2} dt$$

In Figure 2 we presents the rotational correlation function  $C_f(t)$  for each simulated sterol (cholesterol, probe **8** and probe **10**, continuous lines) together with their double exponential fitting function.

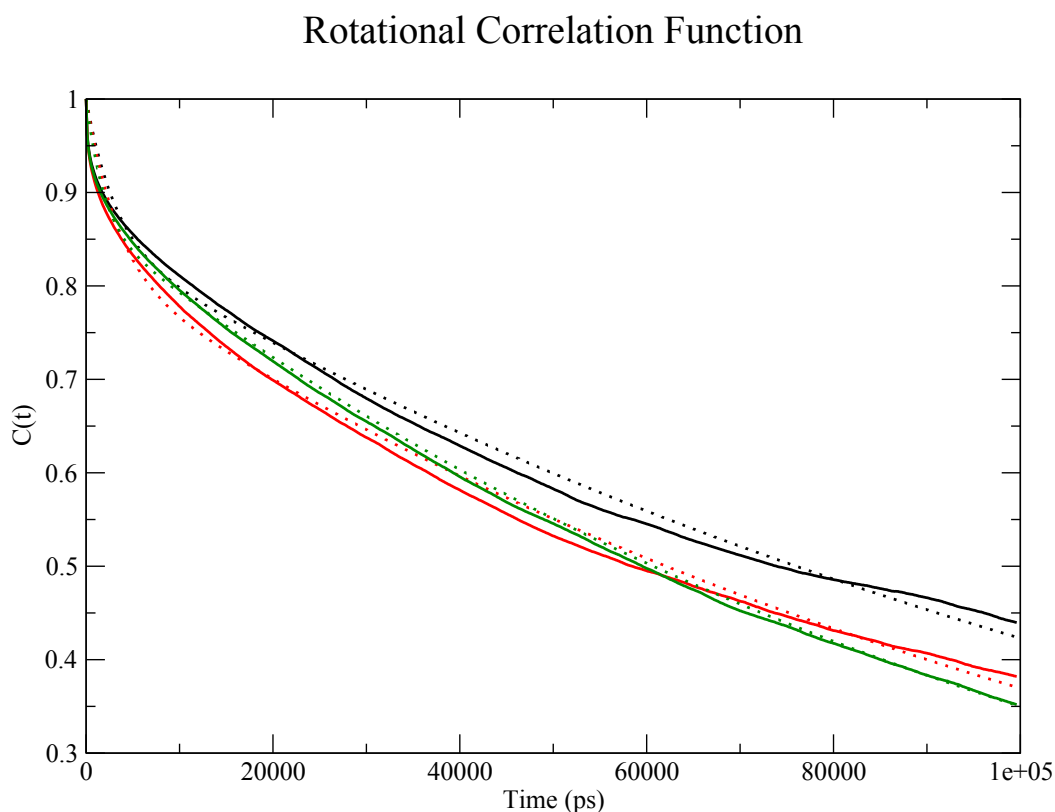

Figure 2: Rotational correlation function (straight lines) and fitting (dotted lines) for: cholesterol (black), probe 8 (red) and probe (10).

### 3. Bibliography

- 1 M. G. Delcey, D. G. Truhlar, A. Nenov, I. Schapiro, I. Fdez. Galván, M. Garavelli, L. De Vico, A. Giussani, T. B. Pedersen, T. Müller, V. Veryazov, F. Zapata, J. Segarra-Martí, V. P. Vysotskiy, I. Rivalta, C. E. Hoyer, S. Vancoillie, F. Plasser, B. Pritchard, M. Olivucci, L. M. Frutos, J. Autschbach, D. Peng, R. K. Carlson, M. Stenrup, L. Ungur, O. Weingart, L. Gagliardi, A. Valentini, H. Lischka, D. Ma, R. Lindh, N. Ferré, G. Li Manni, P. Å. Malmqvist, L. F. Chibotaru, F. Aquilante and M. Reiher, *J. Comput. Chem.*, 2015, **37**, 506–541.
- 2 L. J. Nåbo, N. H. List, S. Witzke, D. Wüstner, H. Khandelia and J. Kongsted, *Biochim.*

*Biophys. Acta - Biomembr.*, 2015, **1848**, 2188–2199.

3 R. Manual, *Gromacs Reference Manual*, 2007.
